# Supplementary material for: Facile Synthesis of Nanosheet-Stacked Hierarchical ZSM-5 Zeolite for Efficient Catalytic Cracking of n-Octane to Produce Light Olefins
Source: MDPI journal article supplement (doi:10.3390/catal12030351), 2022-03-21
Supplement: s1 [file s1]

# **Facile Synthesis of Nanosheet-Stacked Hierarchical ZSM-5 Zeolite for Efficient Catalytic Cracking of n-Octane to Produce Light Olefins**

**Peng Wang**<sup>1</sup>, **Xia Xiao**<sup>1,\*</sup>, **Yutong Pan**<sup>1</sup>, **Zhen Zhao**<sup>1,2,\*</sup>, **Guiyuan Jiang**<sup>2,\*</sup>, **Zhongdong Zhang**<sup>3,\*</sup>, **Fanfang Meng**<sup>3</sup>, **Yuming Li**<sup>2</sup>, **Xiaoqiang Fan**<sup>1</sup>, **Lian Kong**<sup>1</sup> and **Zean Xie**<sup>1</sup>

<sup>1</sup> Institute of Catalysis for Energy and Environment, Shenyang Normal University, Shenyang 110034, China; pengw0511@163.com (P.W.); yutongpan2022@126.com (Y.P.); fanxiaoqiang@synu.edu.cn (X.F.); konglian@synu.edu.cn (L.K.); xiezean@synu.edu.cn (Z.X.)

<sup>2</sup> State Key Laboratory of Heavy Oil Processing, China University of Petroleum, Beijing 102249, China; liyuming@cup.edu.cn

<sup>3</sup> Petrochemical Research Institute, PetroChina, Beijing 102206, China; mengfanfang@petrochina.com.cn

\* Correspondence: xiaoxia@synu.edu.cn (X.X.); zhenzhao@cup.edu.cn (Z.Z.); jianggy@cup.edu.cn (G.J.); zhangzhongdong@petrochina.com.cn (Z.Z.); Tel.: +86-24-86579800 (Zhen Zhao)

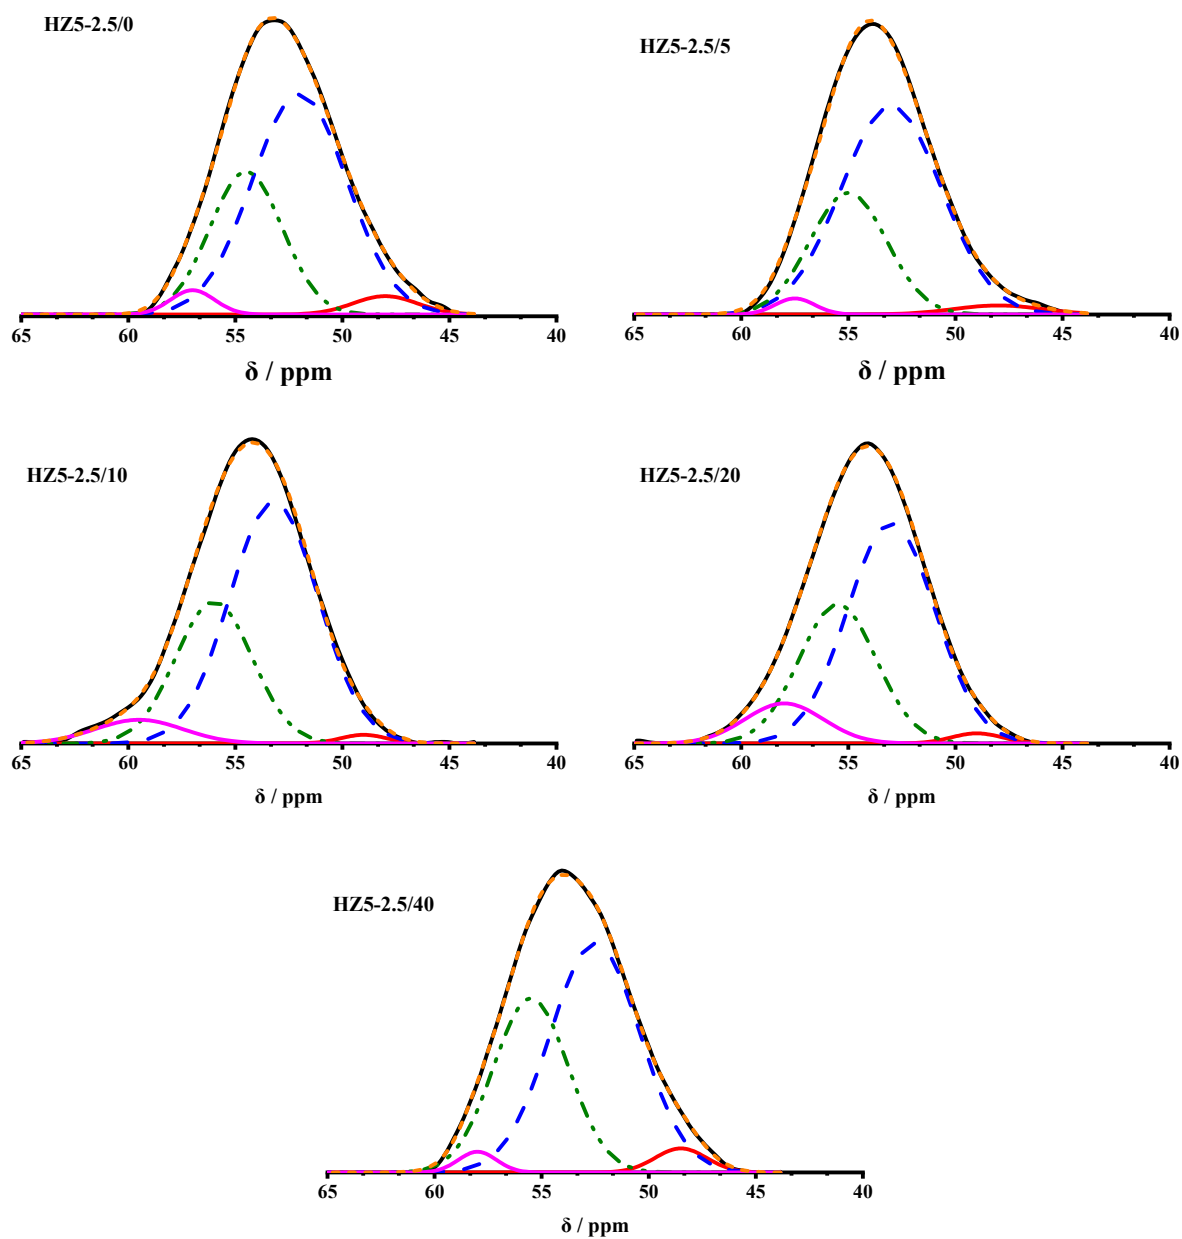

**Figure S1.** Deconvolution of the  $^{27}\text{Al}$  MAS NMR spectra of the as-prepared ZSM-5 zeolites. The experimental spectra are in black line and the fitted spectra are shown in orange dashed line.

**Table S1.** Distribution of Al species determined by deconvolution of the  $^{27}\text{Al}$  MAS NMR spectra of the as-prepared ZSM-5 zeolites.

| Scheme .          | Relative peak areas (%) |                     |                     |                     |
|-------------------|-------------------------|---------------------|---------------------|---------------------|
|                   | Al(49) <sup>a</sup>     | Al(53) <sup>a</sup> | Al(56) <sup>a</sup> | Al(58) <sup>a</sup> |
| <b>HZ5-2.5/0</b>  | 3.5                     | 62.4                | 30.9                | 3.2                 |
| <b>HZ5-2.5/5</b>  | 2.5                     | 66.0                | 29.5                | 2.0                 |
| <b>HZ5-2.5/10</b> | 1.2                     | 61.7                | 31.2                | 6.0                 |
| <b>HZ5-2.5/20</b> | 1.5                     | 57.3                | 31.9                | 9.3                 |
| <b>HZ5-2.5/40</b> | 3.5                     | 57.7                | 36.6                | 2.2                 |

<sup>a</sup> The values in the brackets are corresponding to the chemical shift (ppm) of Al species.
